# Supplementary material for: Strebluses E–H, four new stilbene-like derivatives from the stems of Streblus ilicifolius
Source: Royal Society of Chemistry journal article supplement (doi:10.1039/d2ra07294g), 2022-12-22
Supplement: d2ra07294g1.pdf [file d2ra07294g1.pdf]

*Supplementary data*

**Strebluses E–H, four new stilbene-like derivatives from the stems of  
*Streblus ilicifolius***

Tho Huu Le,<sup>abc</sup> Phu Hoang Dang,<sup>abc</sup> Hai Xuan Nguyen,<sup>abc</sup> Truong Nhat Van Do,<sup>abc</sup> Nhan Trung Nguyen,<sup>\*abc</sup> and  
Mai Thanh Thi Nguyen<sup>\*abc</sup>

---

<sup>a</sup> Faculty of Chemistry, University of Science, Ho Chi Minh City, 72711, Vietnam.

E-mail: [nttmai@hcmus.edu.vn](mailto:nttmai@hcmus.edu.vn)

Email: [ntnhan@hcmus.edu.vn](mailto:ntnhan@hcmus.edu.vn)

<sup>b</sup> Vietnam National University, Ho Chi Minh City, 71300, Vietnam

<sup>c</sup> Research Lab for Drug Discovery and Development, University of Science, Ho Chi Minh City, 72711, Vietnam

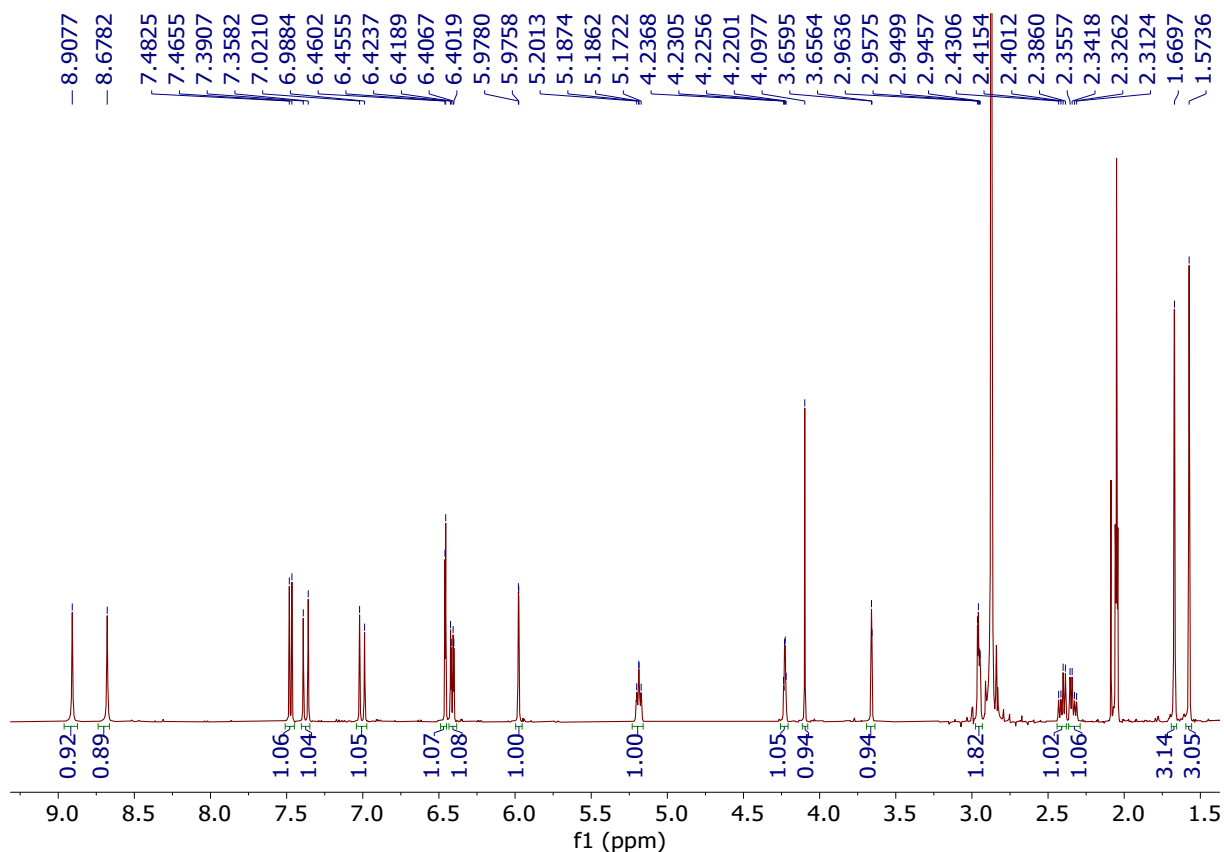

Figure S1.  $^1\text{H}$  NMR spectrum of **1** (500 MHz, acetone- $d_6$ ).

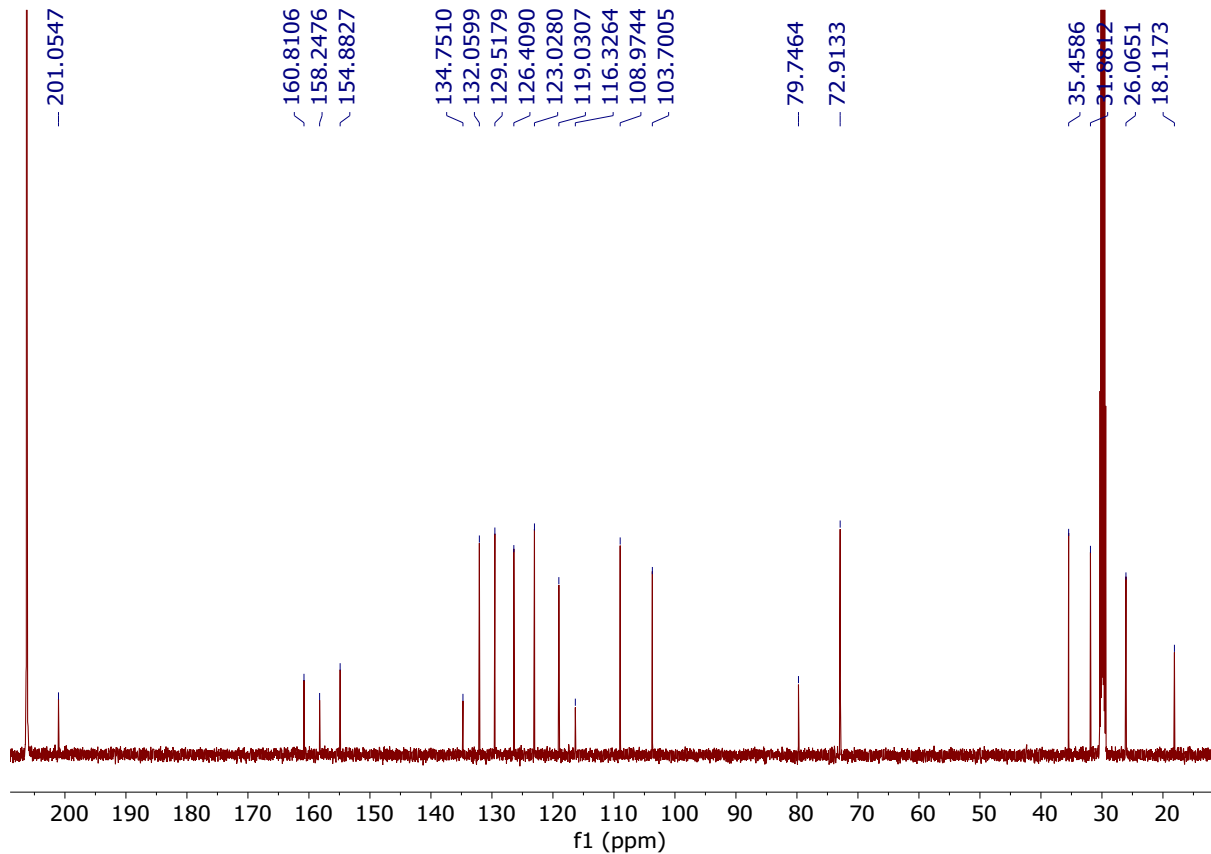

Figure S2.  $^{13}\text{C}$  NMR spectrum of **1** (125 MHz, acetone- $d_6$ ).

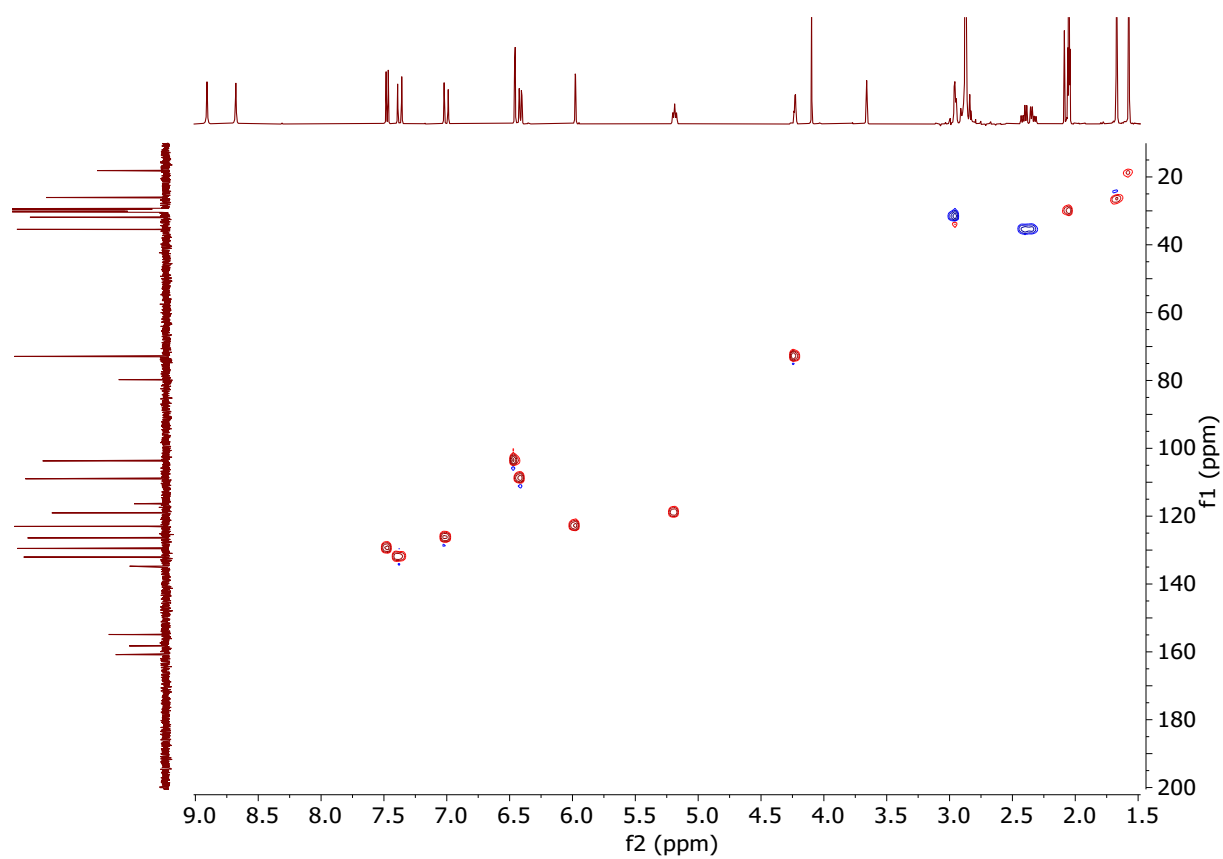

Figure S3. HSQC NMR spectrum of **1**.

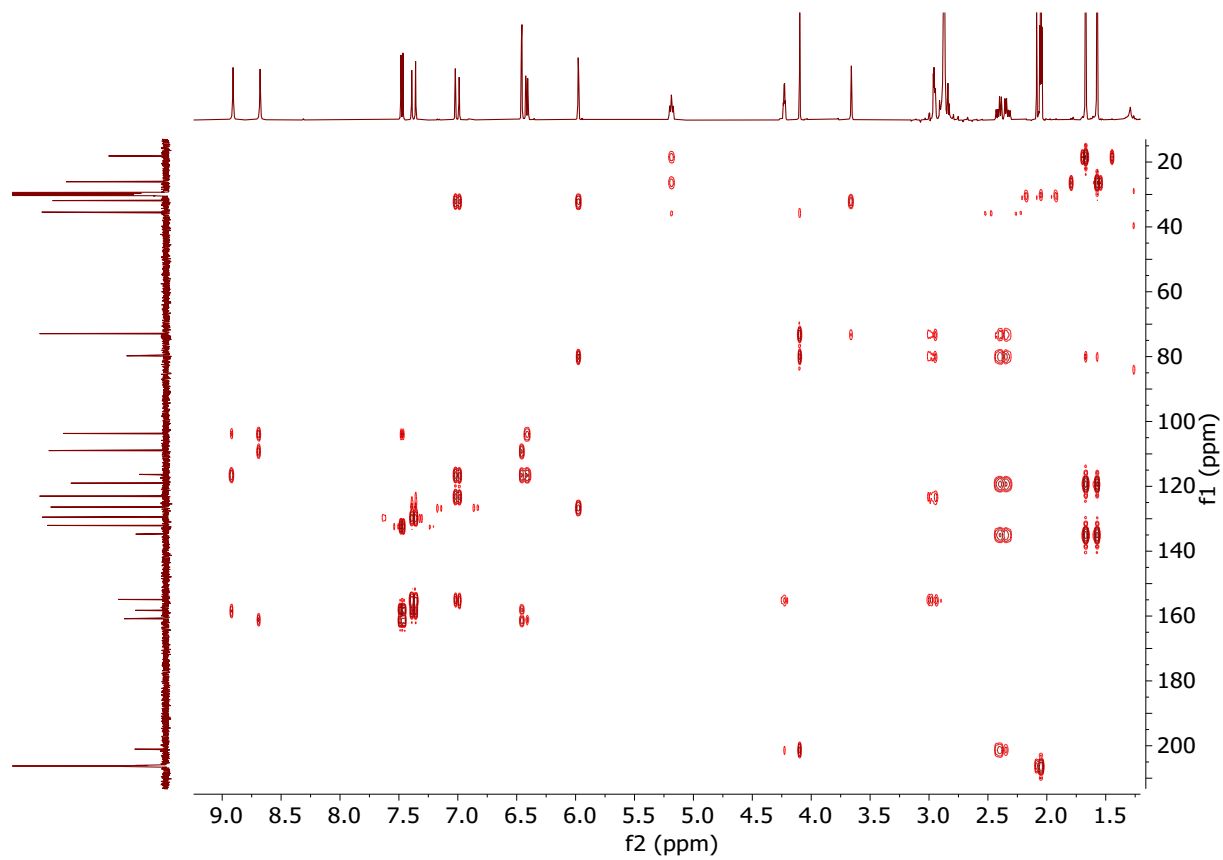

Figure S4. HMBC NMR spectrum of **1**.

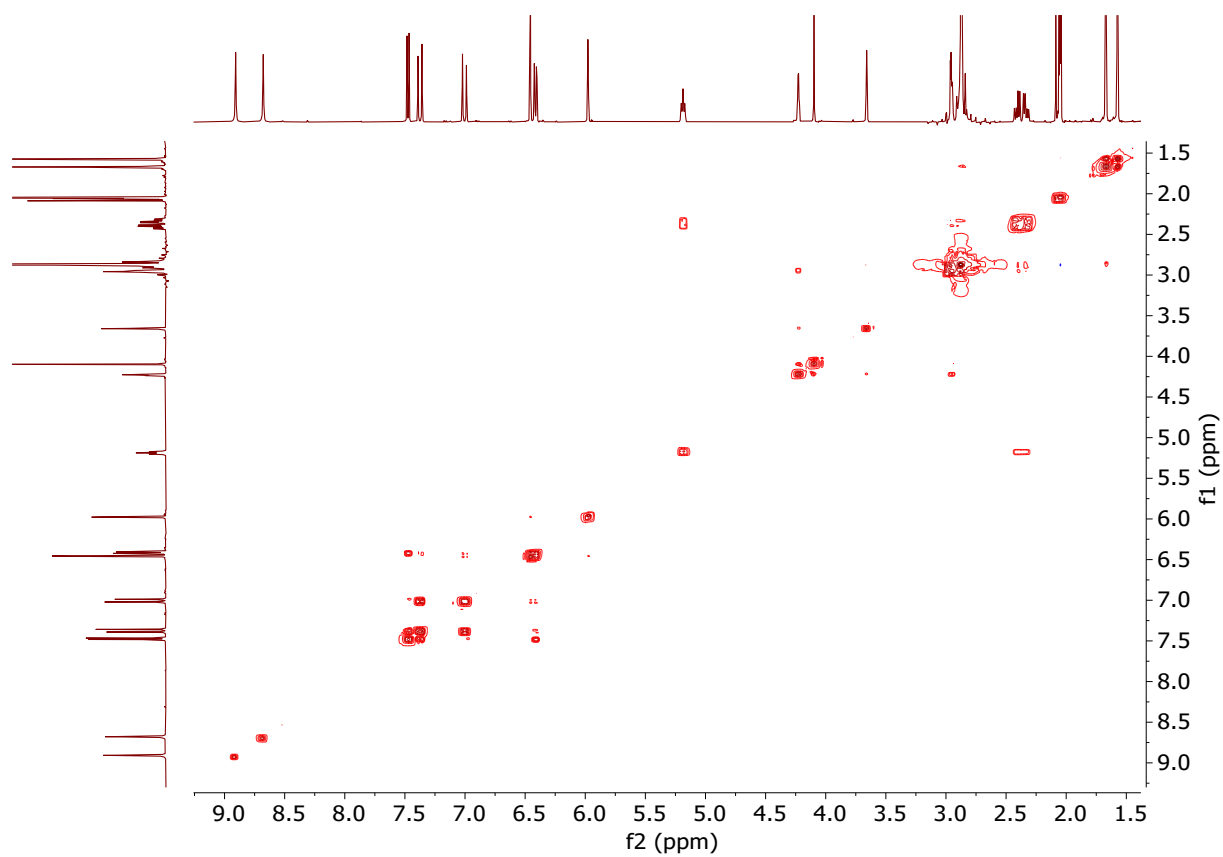

Figure S5. COSY NMR spectrum of **1**.

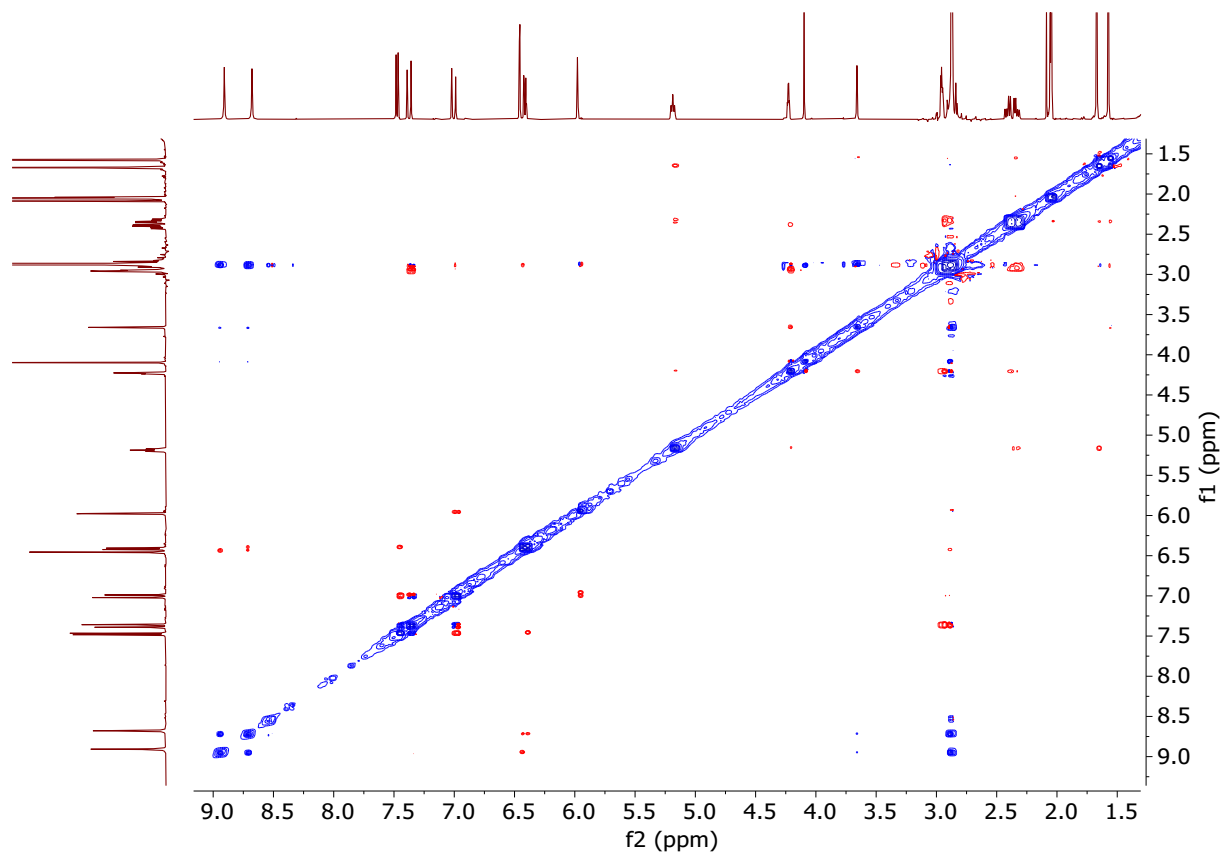

Figure S6. NOESY NMR spectrum of **1**.

|                    |                       |                               |         |                        |                       |
|--------------------|-----------------------|-------------------------------|---------|------------------------|-----------------------|
| <b>Sample Name</b> | DNT04                 | <b>Position</b>               | P1-C9   | <b>Instrument Name</b> | Instrument 1          |
| <b>User Name</b>   |                       | <b>Inj Vol</b>                | 2       | <b>InjPosition</b>     |                       |
| <b>Sample Type</b> | Sample                | <b>IRM Calibration Status</b> | Success | <b>Data Filename</b>   | DNT04.d               |
| <b>ACQ Method</b>  | Cot ngan - MSMS_Pos.m | <b>Comment</b>                |         | <b>Acquired Time</b>   | 01/07/2021 5:14:21 PM |

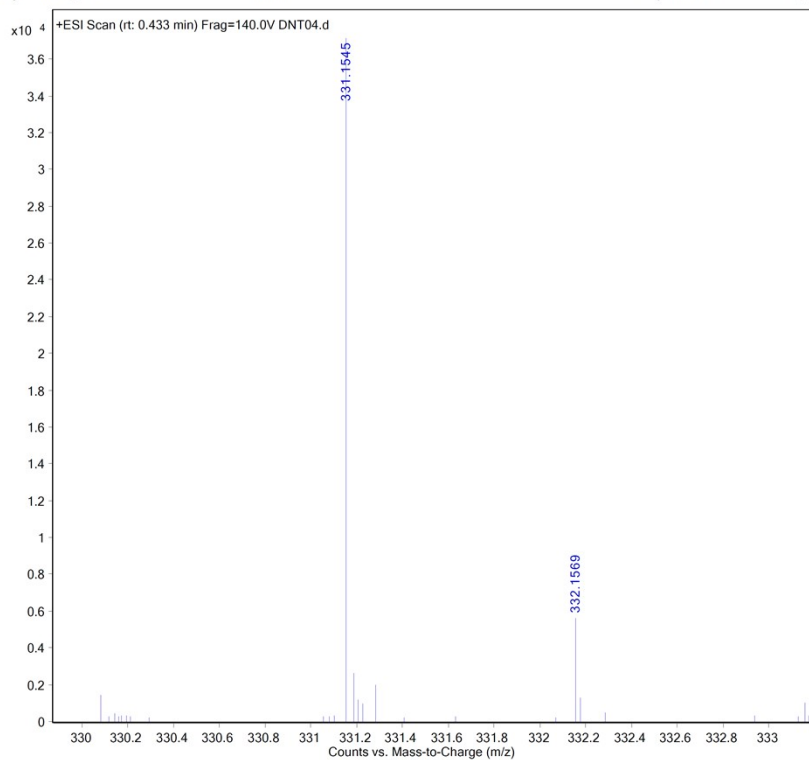

**Figure S7.** HRESIMS spectrum of **1**.

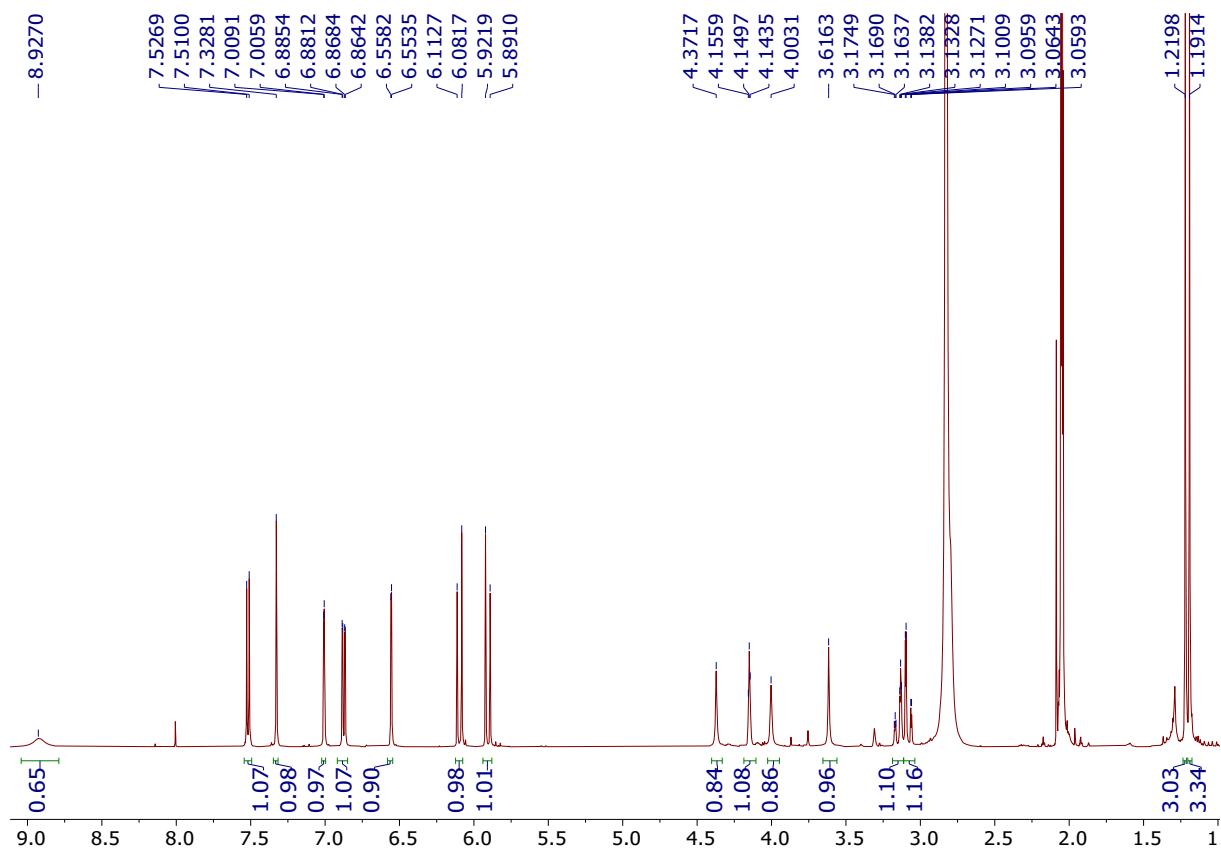

Figure S8.  $^1\text{H}$  NMR spectrum of **2** (500 MHz, acetone- $d_6$ ).

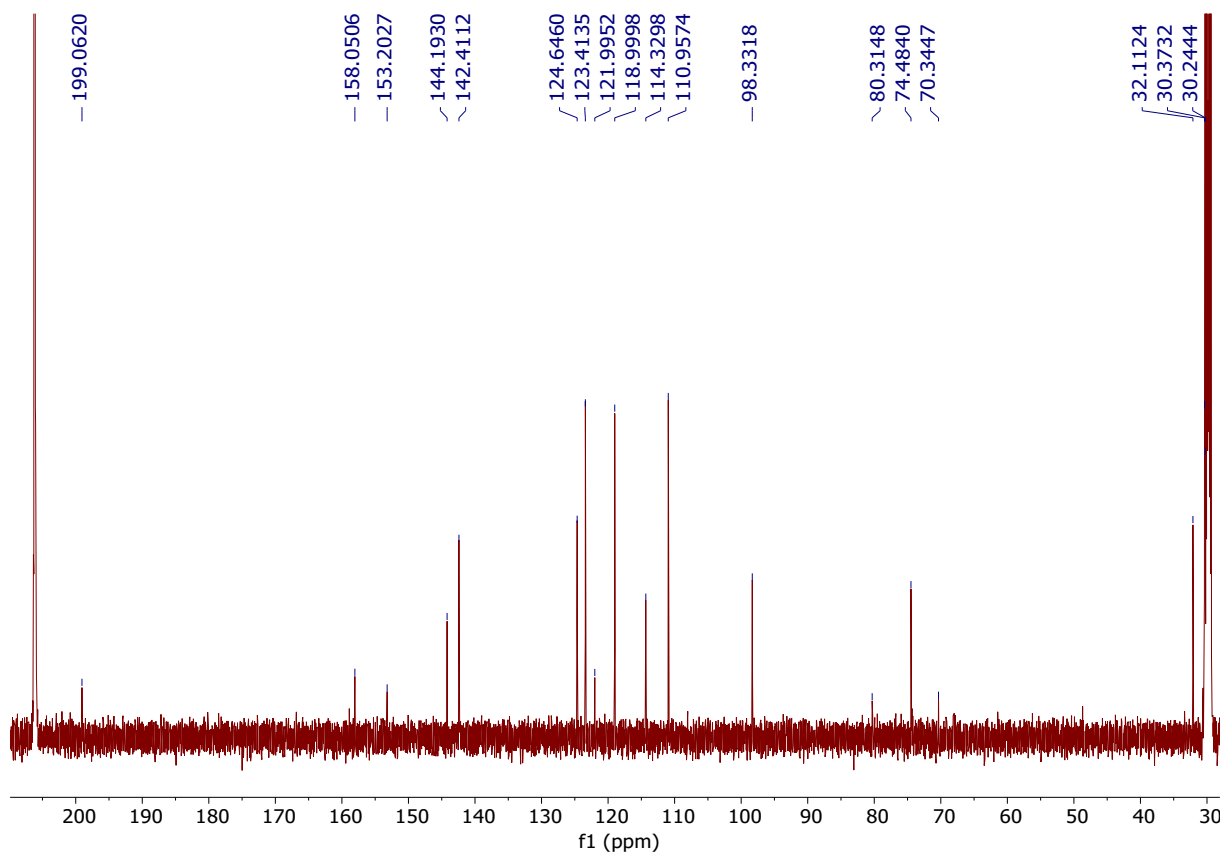

Figure S9.  $^{13}\text{C}$  NMR spectrum of **2** (125 MHz, acetone- $d_6$ ).

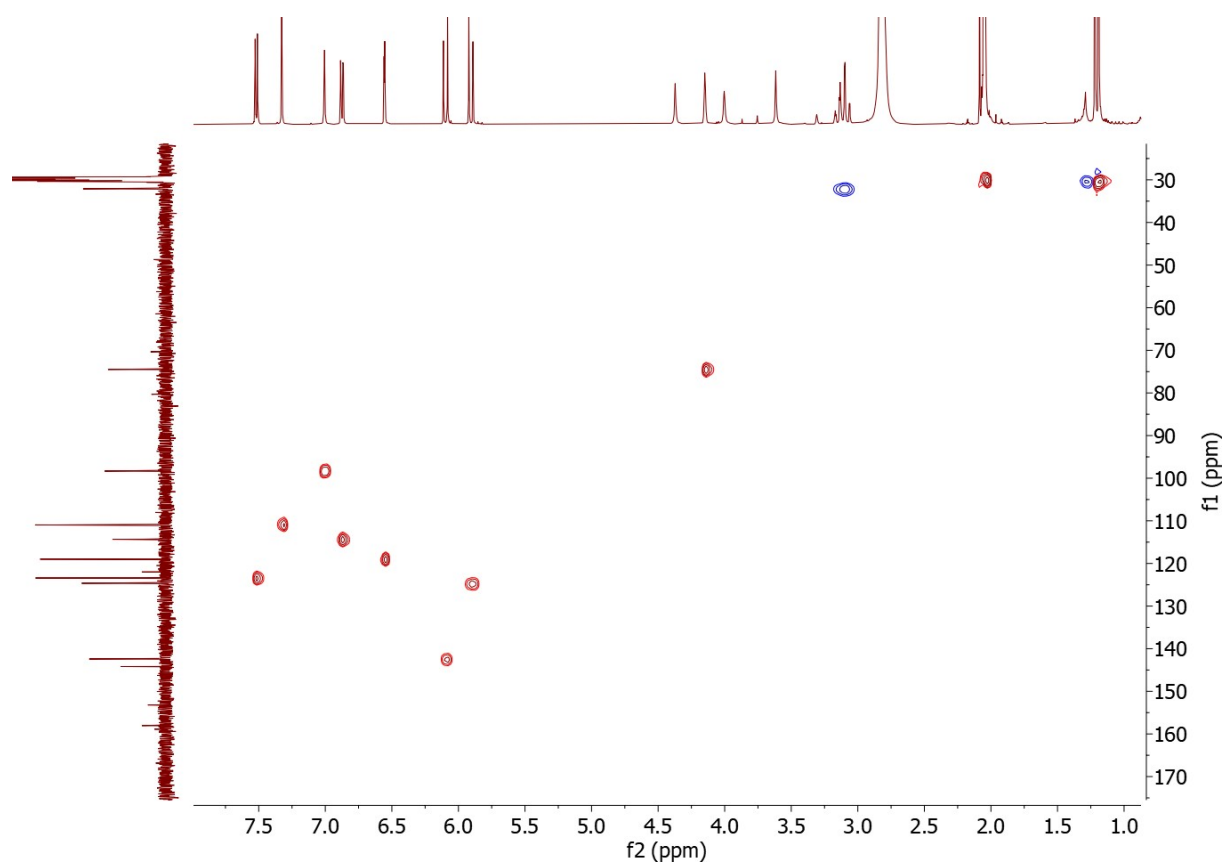

Figure S10. HSQC NMR spectrum of **2**.

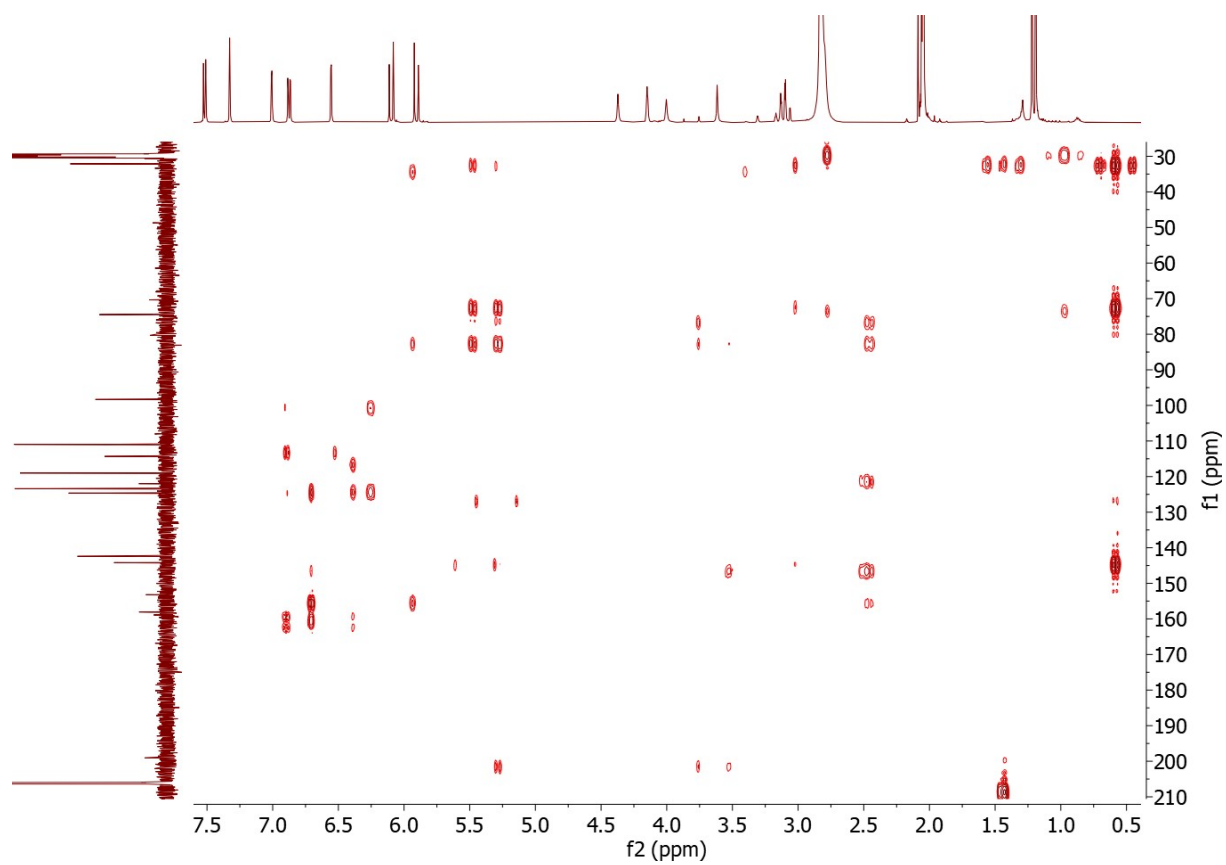

Figure S11. HMBC NMR spectrum of **2**.

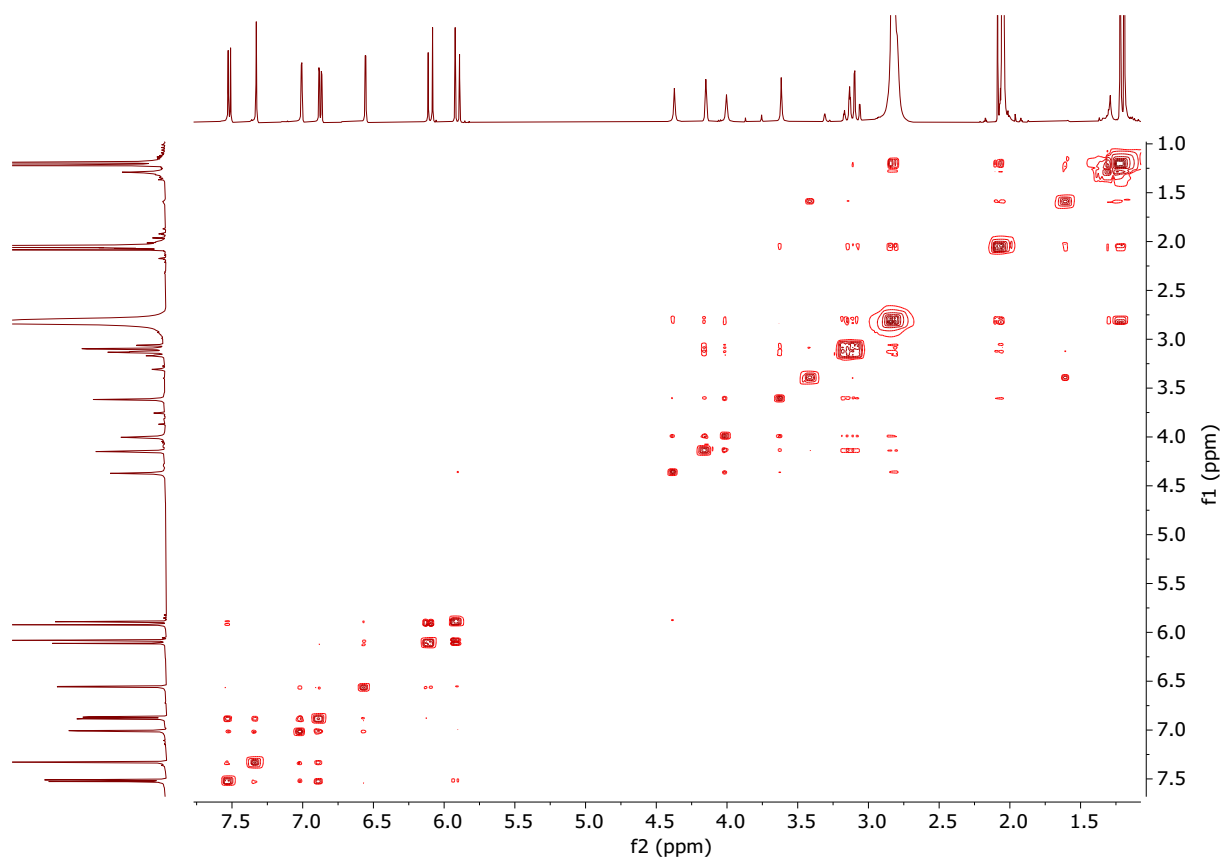

Figure S12. COSY NMR spectrum of **2**.

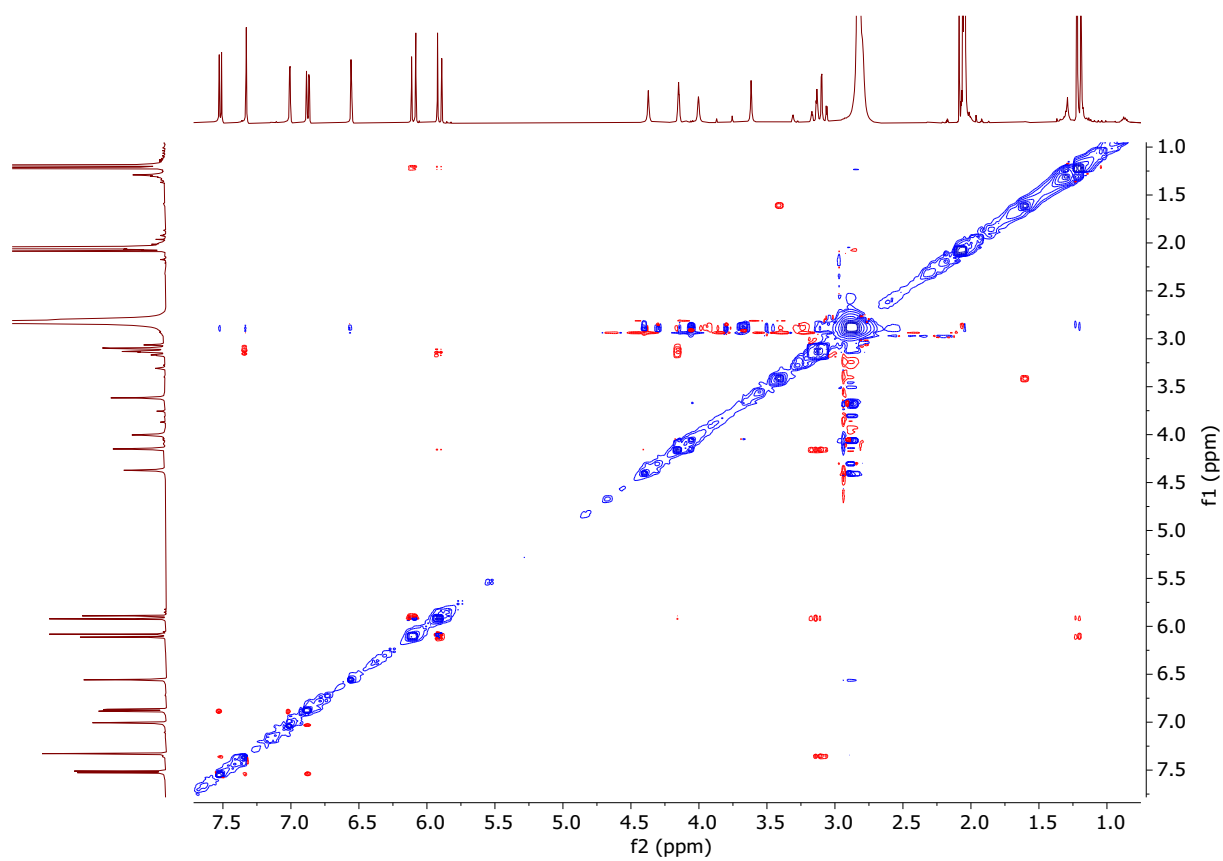

Figure S13. NOESY NMR spectrum of **2**.



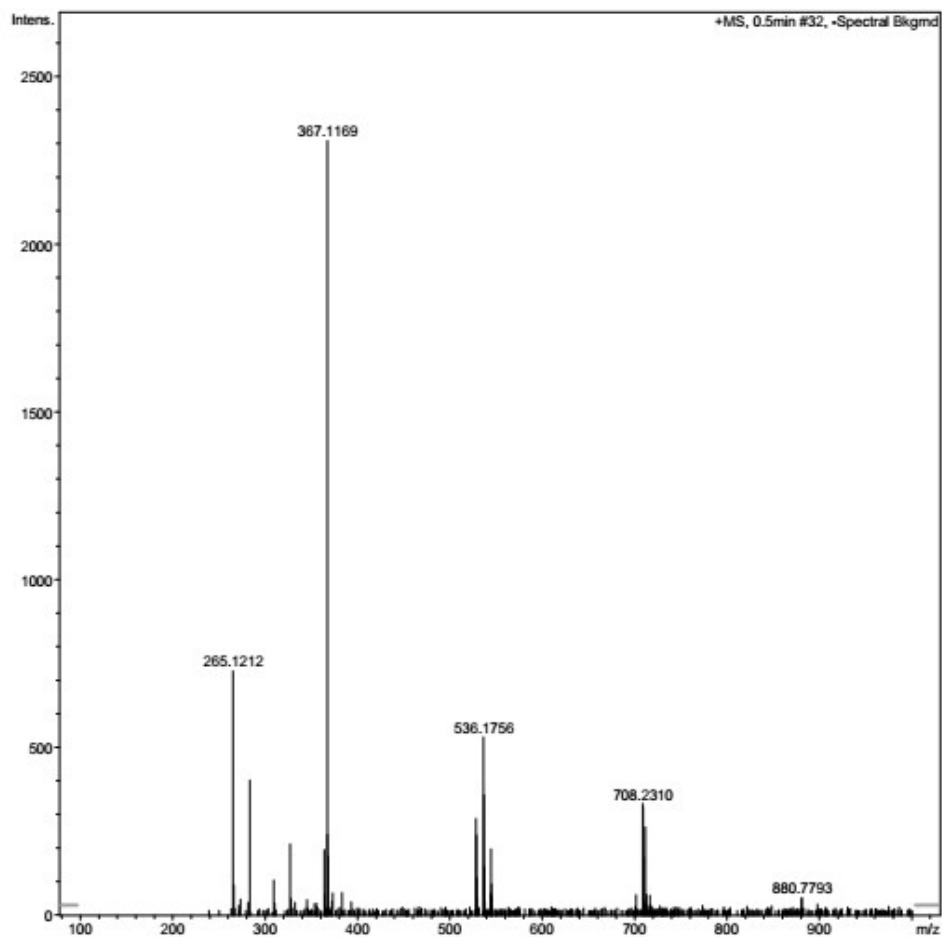

**Figure S14.** HRESIMS spectrum of **2**.

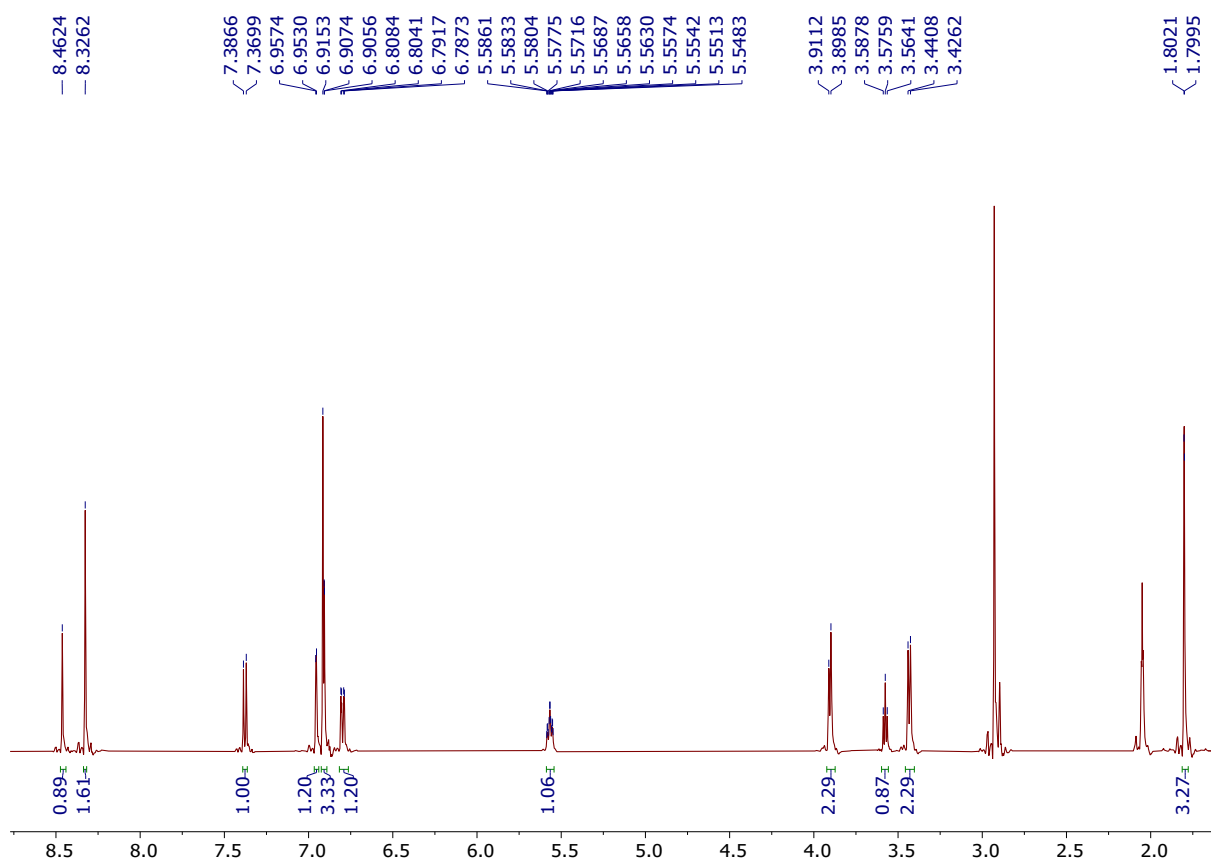

Figure S15.  $^1\text{H}$  NMR spectrum of **3** (500 MHz, acetone- $d_6$ ).

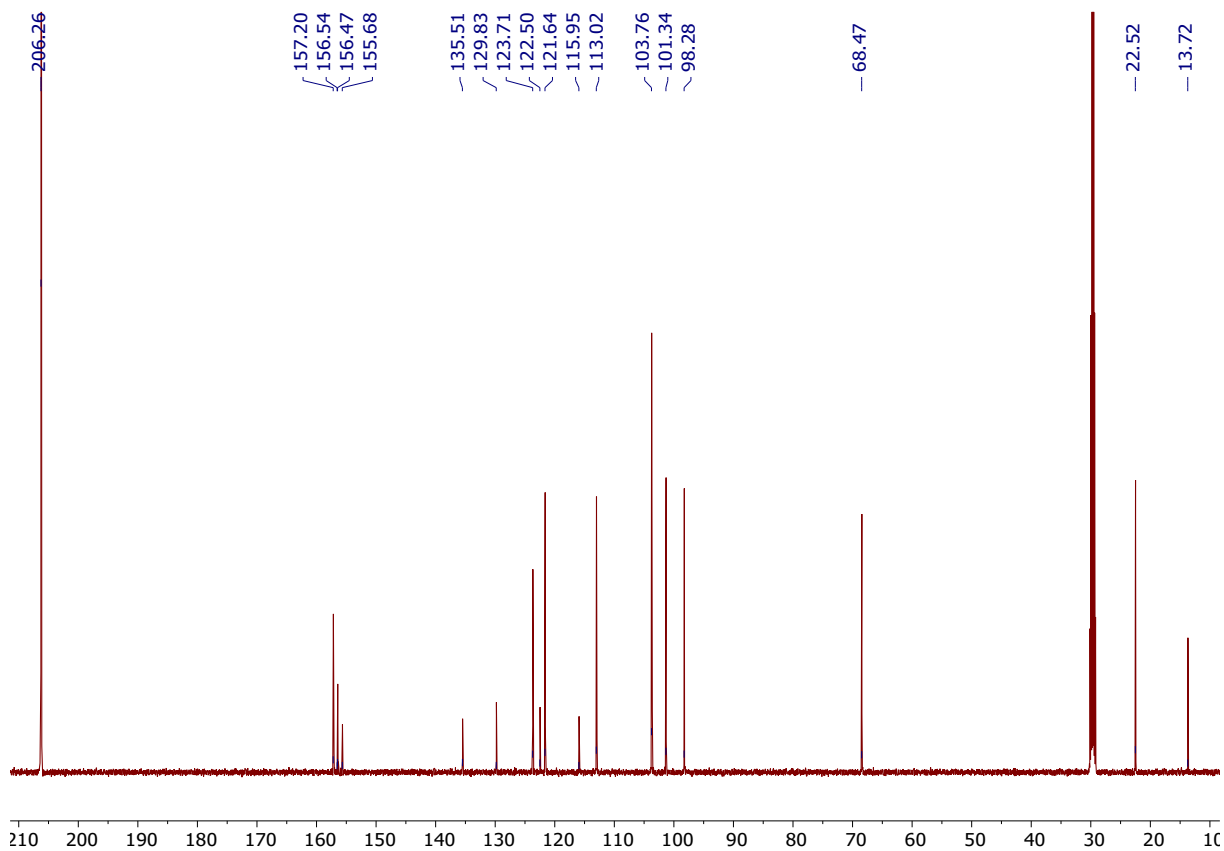

Figure S16.  $^{13}\text{C}$  NMR spectrum of **3** (125 MHz, acetone- $d_6$ ).

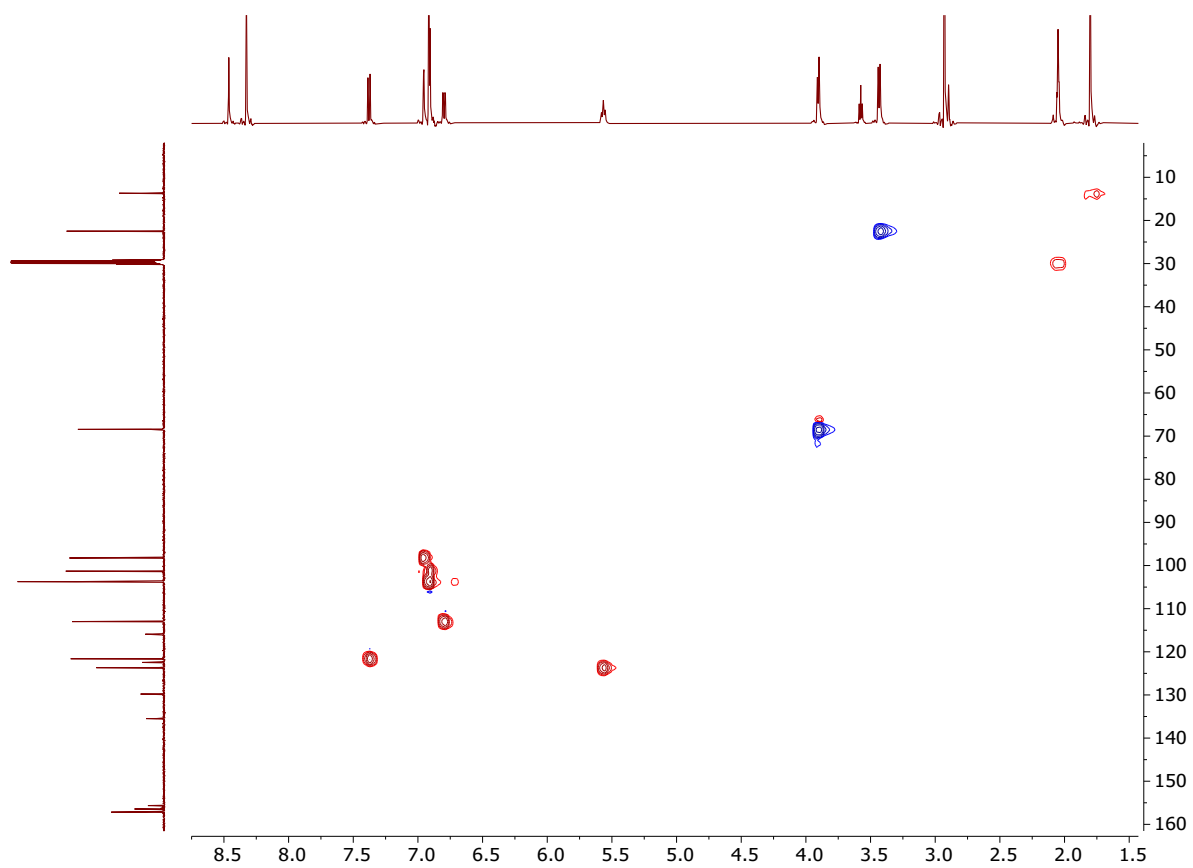

Figure S17. HSQC NMR spectrum of **3**.

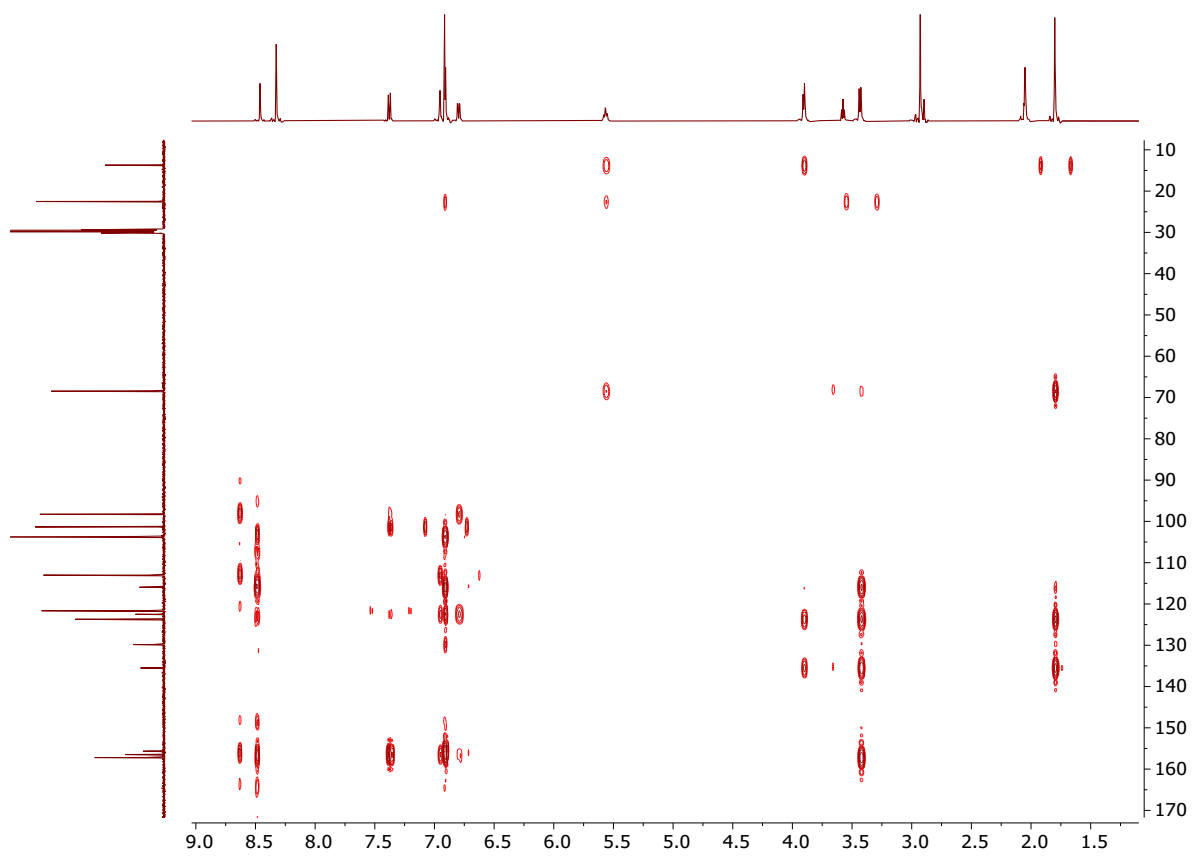

Figure S18. HMBC NMR spectrum of **3**.

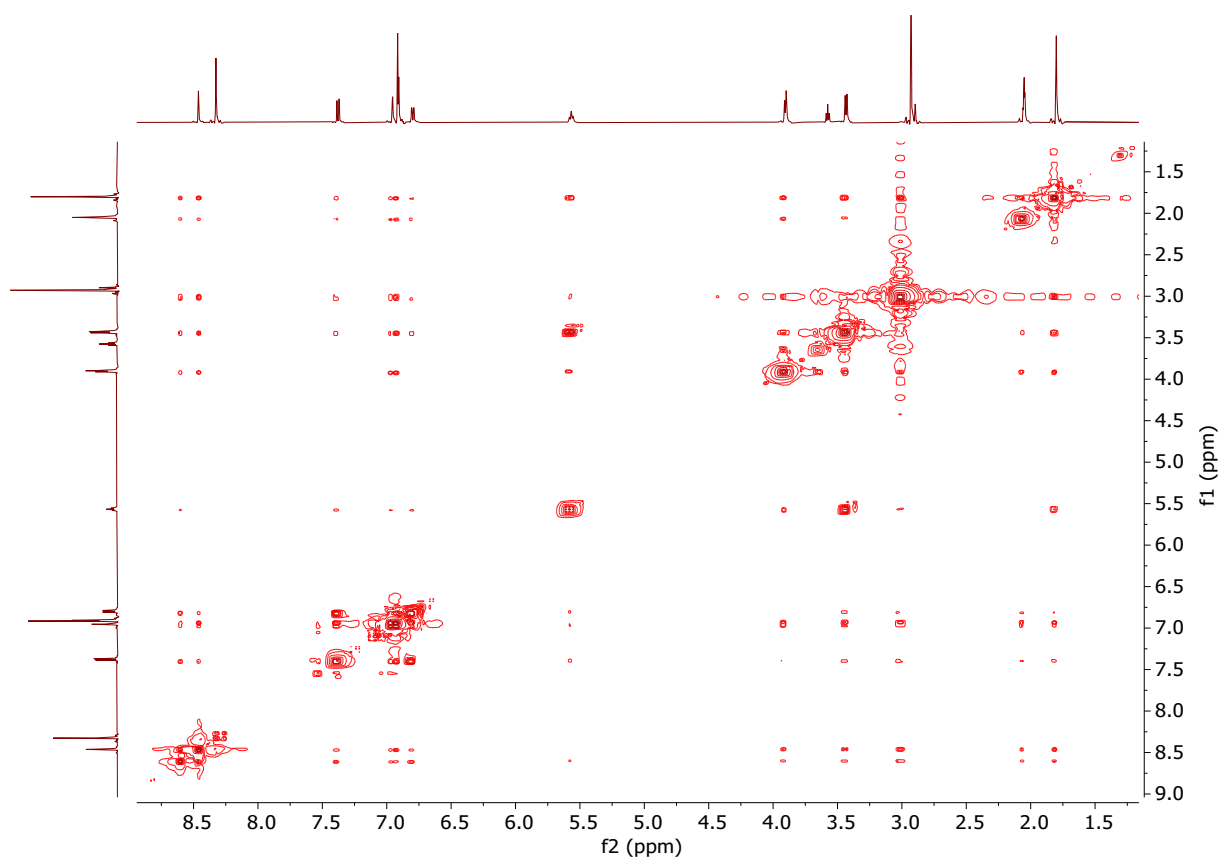

Figure S19. COSY NMR spectrum of **3**.

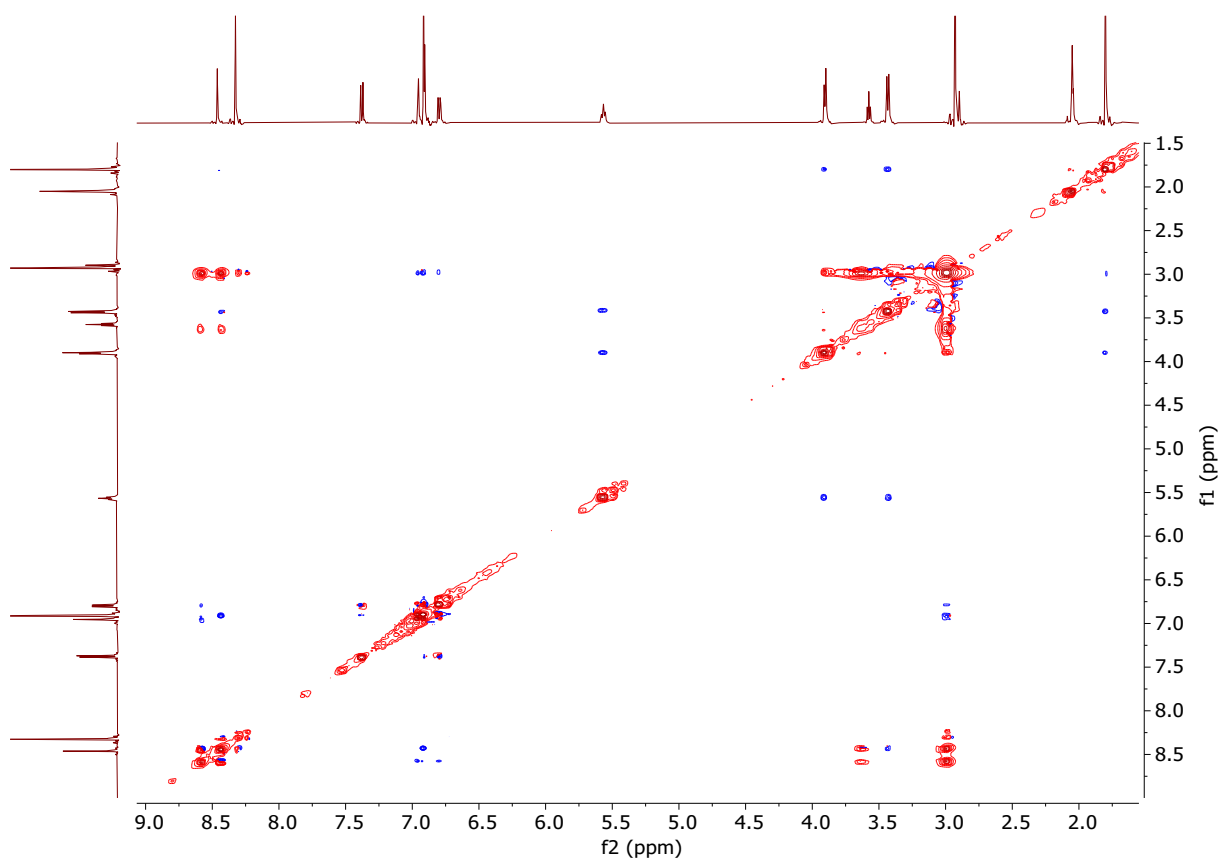

Figure S20. NOESY NMR spectrum of **3**.

|               |        |             |                      |                 |              |                        |                       |
|---------------|--------|-------------|----------------------|-----------------|--------------|------------------------|-----------------------|
| Sample Name   | N953   | Position    | P1-C3                | Instrument Name | Instrument 1 | User Name              |                       |
| Inj Vol       | 2      | InjPosition |                      | SampleType      | Sample       | IRM Calibration Status | Success               |
| Data Filename | N953.d | ACQ Method  | Cot ngan - MSMS_Neg. | Comment         |              | Acquired Time          | 05/11/2020 6:31:02 PM |

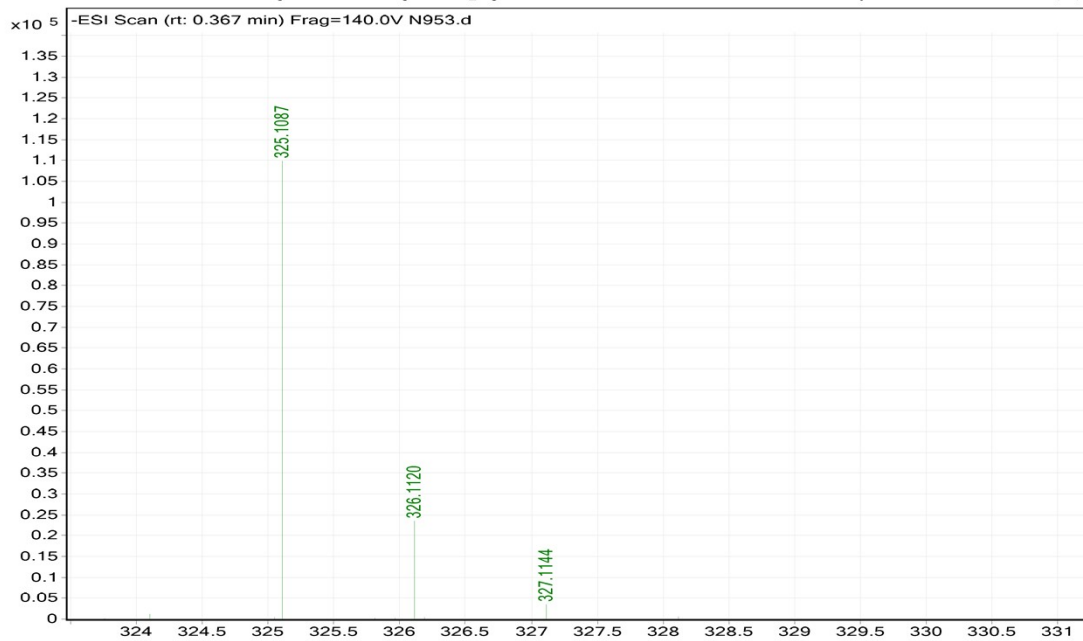

Figure S21. HRESIMS spectrum of 3.

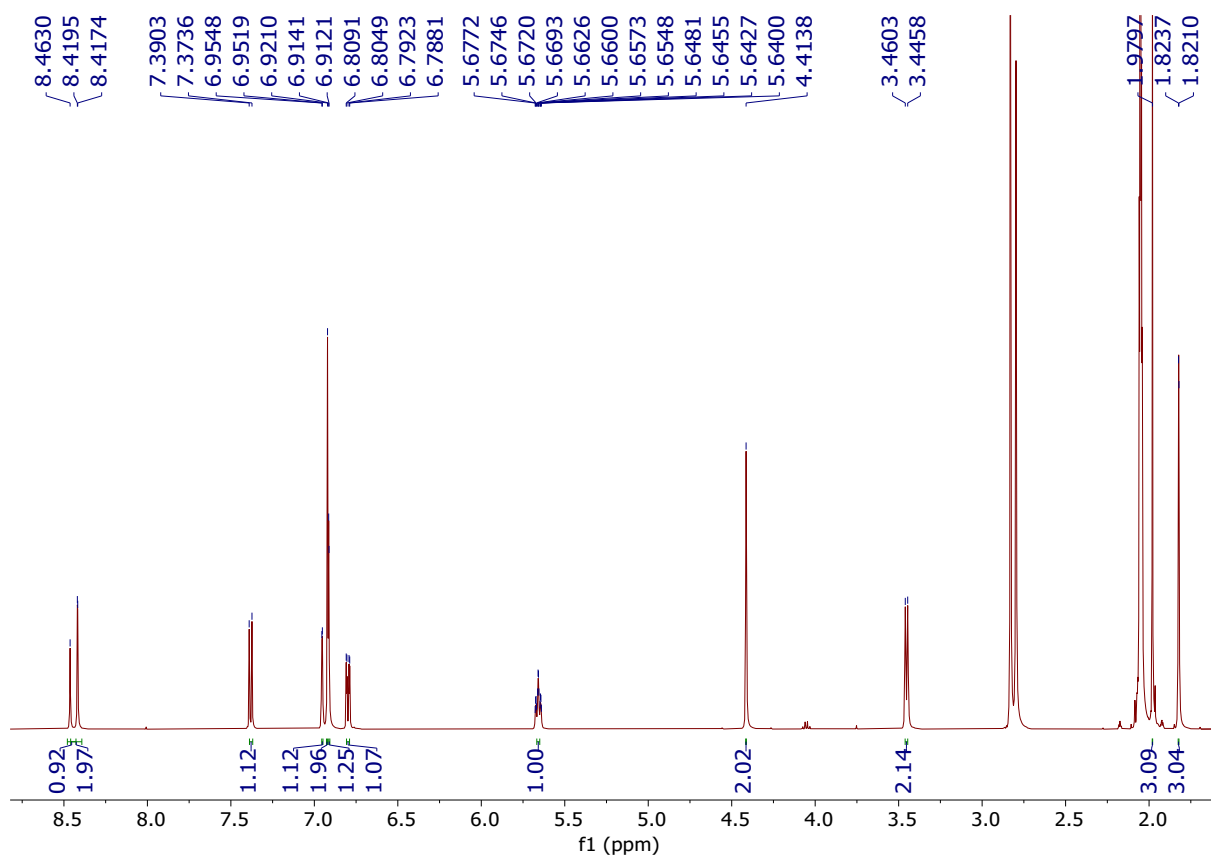

Figure S22.  $^1\text{H}$  NMR spectrum of **4** (500 MHz, acetone- $d_6$ ).

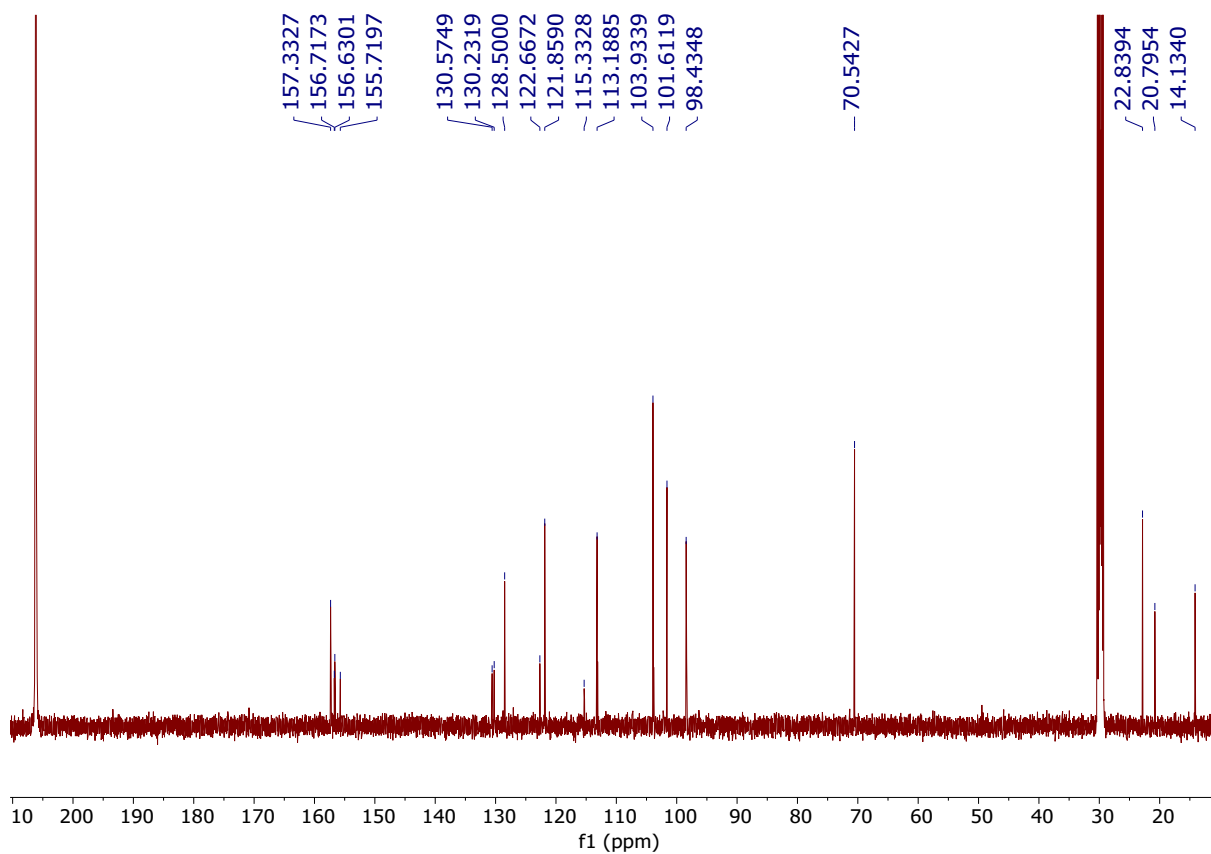

Figure S23.  $^{13}\text{C}$  NMR spectrum of **4** (125 MHz, acetone- $d_6$ ).

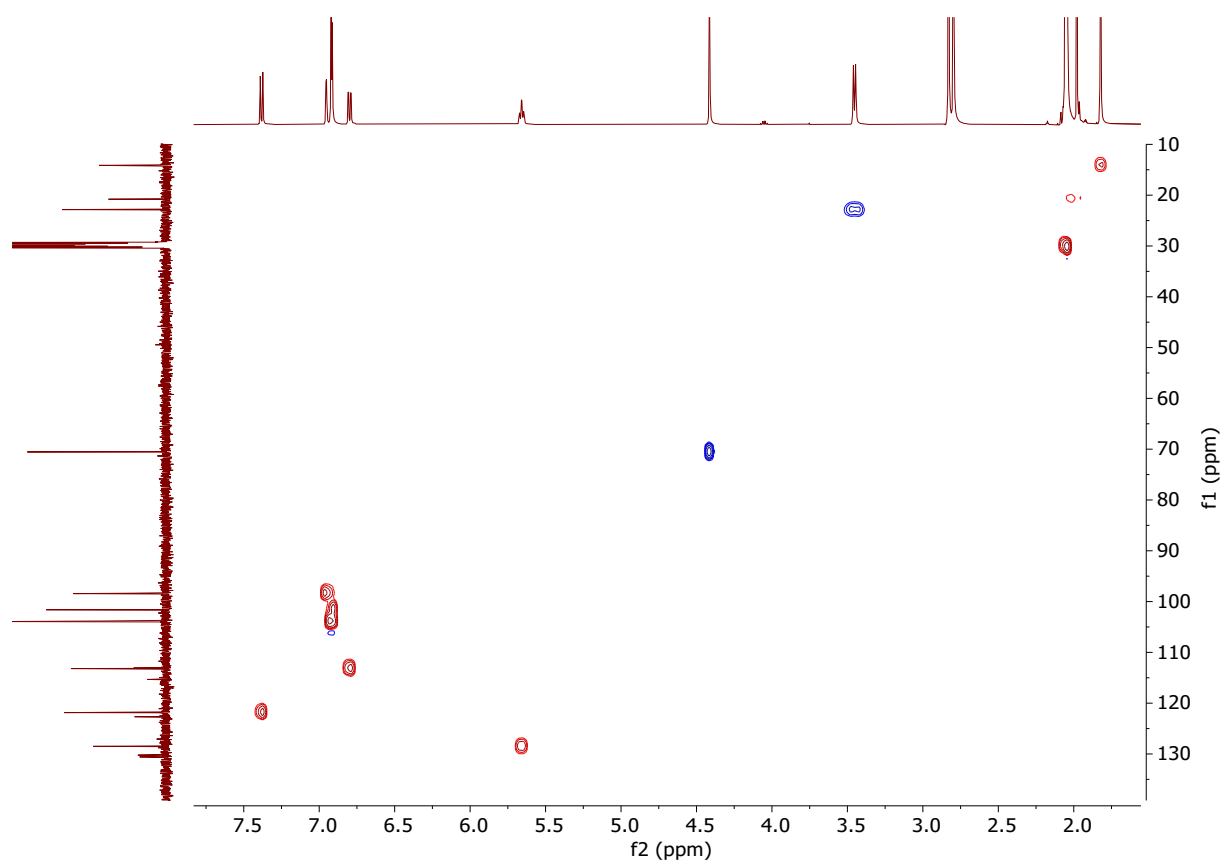

Figure S24. HSQC NMR spectrum of 4.

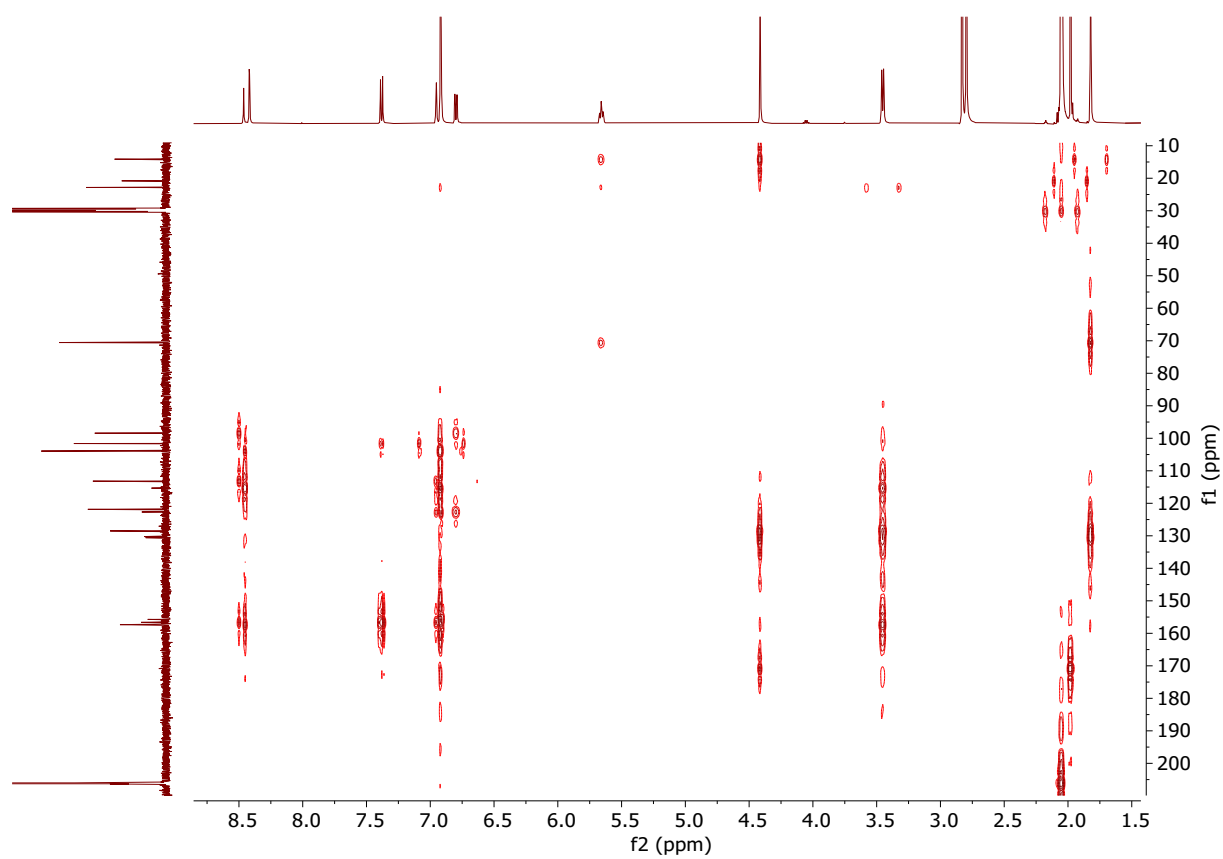

Figure S25. HMBC NMR spectrum of 4.

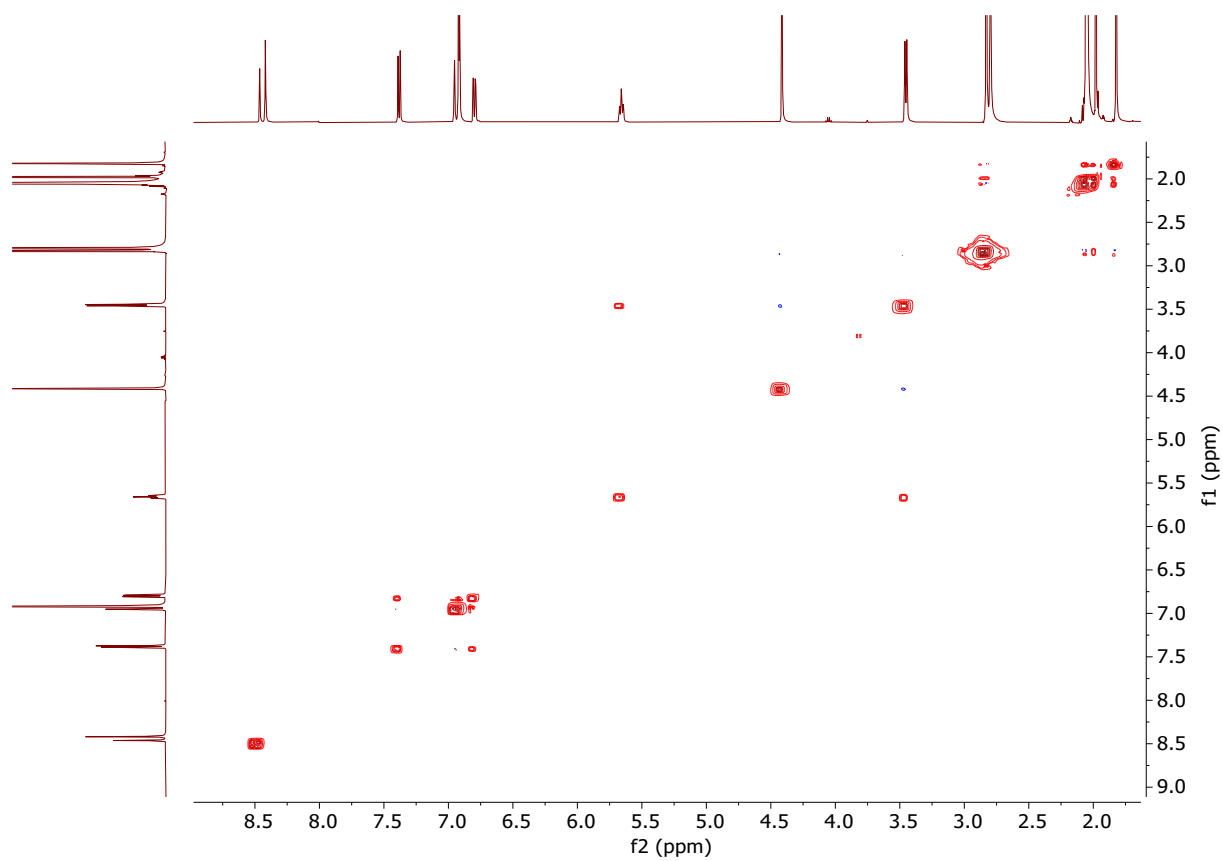

Figure S26. COSY NMR spectrum of **4**.

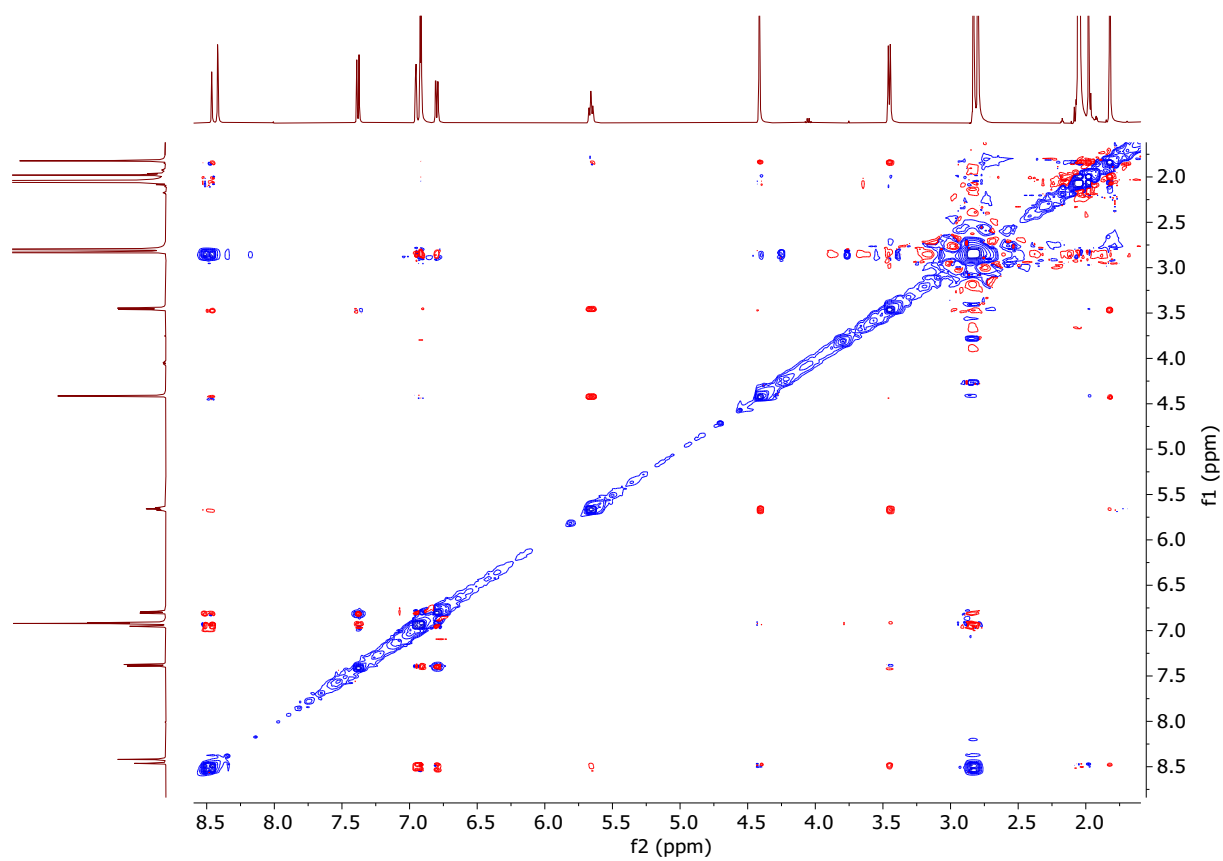

Figure S27. NOESY NMR spectrum of **4**.



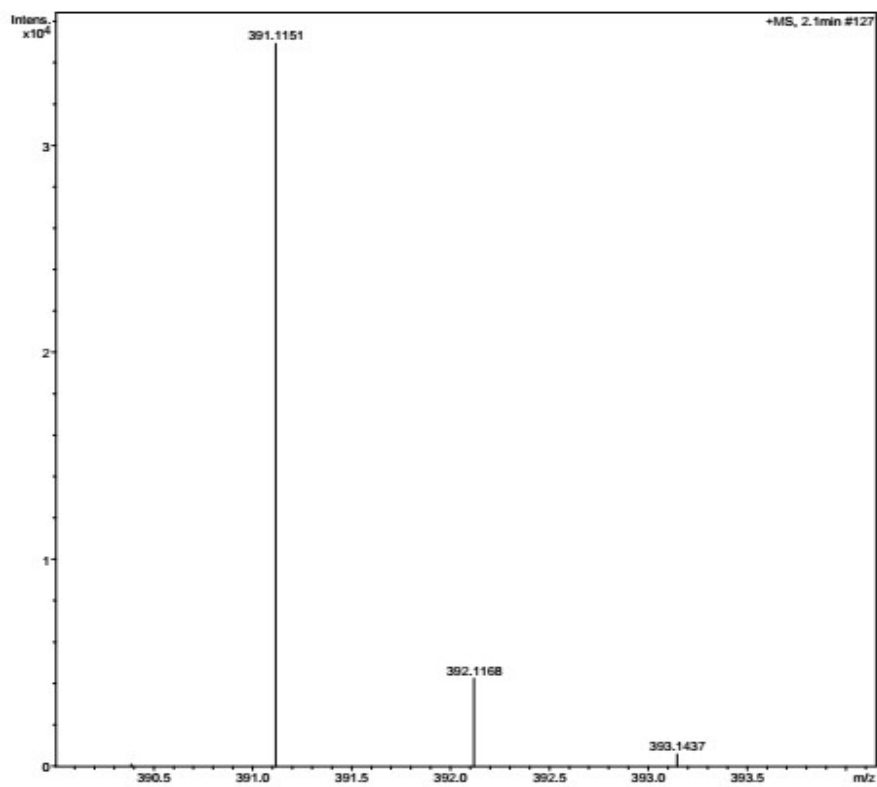

**Figure S28.** HRESIMS spectrum of **4**.
